# Supplementary material for: Genetic Control of Kinetochore-Driven Microtubule Growth in Drosophila Mitosis
Source: MDPI journal article supplement (doi:10.3390/cells11142127), 2022-07-06
Supplement: s1 [file s1]

**Table S1. dsRNAs used for RNA interference.**

| Target gene     | dsRNA probe |            | Sequences of primers (5'→3') used to amplify DNA templates for dsRNA synthesis (*) |
|-----------------|-------------|------------|------------------------------------------------------------------------------------|
|                 | Length, bp  | Reference  |                                                                                    |
| <i>asp</i>      | 959         | [1]        | CTGCGATCTTTCTTCAG<br>AGATGATTACGCCAATGC                                            |
| <i>dgt6</i>     | 785         | [2]        | ATCGGACCATAA<br>TTGTTCTCGGCT                                                       |
| <i>Eb1</i>      | 322         | This study | TGCTGCCGCGCA<br>TGGTGCATCGTCAGGC                                                   |
| <i>Klp10A</i>   | 618         | This study | TTGCTGTCCATC<br>CGATCCTTGTCT                                                       |
| <i>mars</i>     | 576         | [2]        | TGAACTCGCGCT<br>AACTGCTGCAGA                                                       |
| <i>mast</i>     | 913         | This study | CGTTCTCGGAGC<br>ATGTCCACGAAG                                                       |
| <i>mei-38</i>   | 614         | [2]        | CGTCCAAGGATG<br>TGGAAGGGTCTG                                                       |
| <i>Patronin</i> | 923         | [1]        | CGAGCTACAGCACCTGTTTC<br>TGACTGATTGCTGACATCGTCC                                     |

(\*) Each primer contained the following additional sequence of the T7 RNA polymerase-binding site at the 5' end (5'→3'): TAATACGACTCACTATAGGGAGG.

- [1] Pavlova, G.A.; Razuvaeva, A.V.; Popova, J.V.; Andreyeva, E.N.; Yarinich, L.A.; Lebedev, M.O.; Pellacani, C.; Bonaccorsi, S.; Somma, M.P.; Gatti, M.; et al. The role of Patronin in *Drosophila* mitosis. BMC Mol. Cell. Biol. 2019, 20, 7. doi:10.1186/s12860-019-0189-0.
- [2] Somma, M.P.; Ceprani, F.; Bucciarelli, E.; Naim, V.; De Arcangelis, V.; Piergentili, R.; Palena, A.; Ciapponi, L.; Giansanti, M.G.; Pellacani, C.; et al. Identification of *Drosophila* mitotic genes by combining co-expression analysis and RNA interference. PLoS Genet. 2008, 4, e1000126. doi:10.1371/journal.pgen.1000126.
