# Supplementary material for: Genetic Control of Kinetochore-Driven Microtubule Growth in Drosophila Mitosis
Source: MDPI journal article supplement (doi:10.3390/cells11142127), 2022-07-06
Supplement: s1 [file s1]

**Table S2. Primers used for assessment of the RNAi-mediated gene silencing by RT-qPCR.**

| Target gene                    | Primer sequence (5'→3')                           | Primers efficiency, % | Amplicon size (from cDNA), bp |
|--------------------------------|---------------------------------------------------|-----------------------|-------------------------------|
| <i>asp</i>                     | AAGTCGATTGGATCGTCTTTC<br>AATTTAGGATGATCCGGCTG     | 105.1                 | 155                           |
| <i>dgt6</i>                    | AACAGCTTACTCGCACCTGC<br>GCATGGGATCGTTGATCTTG      | 101.3                 | 118                           |
| <i>Eb1</i>                     | TCTGCACAGGTGCAGCTTACTGTCA<br>CTTCTTGAAGCCCGCCTGCA | 102.9                 | 140                           |
| <i>Klp10A</i>                  | GCTGAGCGAACACGAGATGT<br>CAGTGTGGCATTAAACGGTGC     | 100.2                 | 115                           |
| <i>mars</i>                    | CAGACGACGGTTAAAGAAGACA<br>GCGAGACACTAACAAACGGA    | 105.9                 | 121                           |
| <i>mast</i>                    | AGACGCTGAGAAATAAACTAGATGC<br>GCAGCTTTGGTGCATGTGTA | 106.6                 | 147                           |
| <i>mei-38</i>                  | TTTGGCCAGTCGGACTTCGA<br>CTGTTCCCGGCCGATCTTCT      | 101.7                 | 165, 168                      |
| <i>Patronin</i>                | TTTTCAAATACAACCTCAGGAGGCA<br>ATTGTGAAGGCGTCGATGGT | 99.0                  | 82                            |
| <i>RpL32</i><br>(as reference) | CTAAGCTGTCGCACAAATGG<br>AGGAACTTCTTGAATCCGGTG     | 100.0                 | 148                           |
