# Supplementary material for: Genetic Control of Kinetochore-Driven Microtubule Growth in Drosophila Mitosis
Source: Cells. 2022 Jul 6;11(14):2127. doi: 10.3390/cells11142127 (PMC9323100; doi:10.3390/cells11142127)
Supplement: Supplementary file 1 [file cells-11-02127-s001.zip]

Archive with 6 entries (6 files):
- cells-1722269-Figure S1-S10.pdf
- S1 movie.avi
- S2 movie.avi
- S3 movie.avi
- Table S1.pdf
- Table S2.pdf
